# Supplementary material
Source: PubMed Central journal article supplement (PMC4902622)
Supplement: supp_pp.16.00409_PP2016-00409R1_Sup_Fig_S3.pdf [file supp_pp.16.00409_PP2016-00409R1_Sup_Fig_S3.pdf]

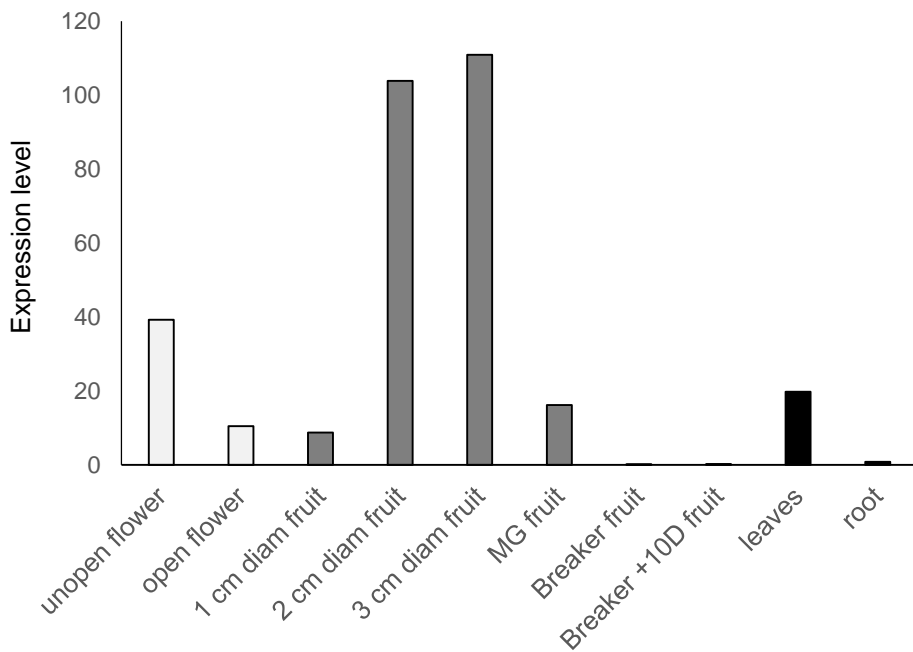

**Supplemental Figure S3.** The *S. lycopersicum* cv Heinz *SIGPAT6* gene expression in flower, fruit, leaves and root. Normalized expression of *SIGPAT6* gene in unopened and opened flowers, young fruits (1 cm, 2 cm and 3 cm diameter), mature green (MG) stage fruit, breaker stage fruit, breaker + 10 days fruit, leaves and roots. Data were collected from the Toronto University public database BAR using the Tomato eFP Browser ([http://bar.utoronto.ca/efp\\_tomato/cgi-bin/efpWeb.cgi](http://bar.utoronto.ca/efp_tomato/cgi-bin/efpWeb.cgi)). diam: diameter, D: days.
