# Supplementary material
Source: PubMed Central journal article supplement (PMC4902622)
Supplement: supp_pp.16.00409_PP2016-00409R1_Supplemental_Materialtbl1.pdf [file supp_pp.16.00409_PP2016-00409R1_Supplemental_Materialtbl1.pdf]

1 **Supplemental Table S1.** Illumina sequencing of BC<sub>1</sub>F<sub>2</sub> bulked individuals with glossy fruit or  
 2 a WT-like fruit. Sequence of the reference genome is the tomato whole genome shotgun  
 3 chromosomes from build release SL2.50 available on the SGN website  
 4 (<http://solgenomics.net>).

|                                                      | <b><i>glossy</i> bulk</b> | <b>WT-like bulk</b> |
|------------------------------------------------------|---------------------------|---------------------|
| Scored phenotype                                     | <i>glossy</i> fruit       | WT-like fruit       |
| Tomato reference genome                              | Heinz 1706 (SL2.50)       | Heinz 1706 (SL2.50) |
| Nb of BC <sub>1</sub> F <sub>2</sub> plants per bulk | 80                        | 80                  |
| Nb of paired reads                                   | 275,301,130               | 346,421,242         |
| % mapped reads                                       | 93.22%                    | 93.05%              |
| Insert size                                          | 539 bp                    | 537 bp              |
| Sequence length                                      | 101 bp                    | 101 bp              |
| Coverage                                             | 29X                       | 37X                 |

5
