# Supplementary material
Source: PubMed Central journal article supplement (PMC4902622)
Supplement: supp_pp.16.00409_PP2016-00409R1_Supplemental_Materialtbl3.pdf [file supp_pp.16.00409_PP2016-00409R1_Supplemental_Materialtbl3.pdf]

1 **Supplemental Table S3.** Identification of the putative causal mutations associated with the  
2 glossy fruit phenotype based on allelic frequency analysis in the *glossy* and WT-like bulks. In  
3 case of a recessive mutation (*i.e.* most EMS mutations), all BC<sub>1</sub>F<sub>2</sub> individuals that exhibit the  
4 mutant phenotype are homozygous for the causal mutation (frequency =1 in the *glossy* bulk).  
5 On the contrary, in the WT-like bulk, the EMS mutation segregates as a Mendelian locus  
6 (frequency ~0.33 in the WT-like bulk). The table reports the number of putative causal  
7 mutations corresponding to three different allelic frequency filters applied to detect the  
8 recessive causal mutation. The number of candidate causal mutations decrease with  
9 stringency of allelic frequency cut-offs. AF= Allelic Frequency.

| <b><i>glossy</i> bulk</b> | <b>WT-like bulk</b> | <b>Nb of EMS mutations</b> |
|---------------------------|---------------------|----------------------------|
| AF>0.9                    | 0.2<AF<0.4          | 535                        |
| AF>0.95                   | 0.2<AF<0.4          | 376                        |
