# Supplementary material
Source: PubMed Central journal article supplement (PMC4902622)
Supplement: supp_pp.16.00409_PP2016-00409R1_Supplemental_Materialtbl4.pdf [file supp_pp.16.00409_PP2016-00409R1_Supplemental_Materialtbl4.pdf]

1 **Supplemental Table S4**

2 **Genes detected**

3 Genes detected before the differential analysis:

| sample | replicate | Detected genes | mean    | SD    |
|--------|-----------|----------------|---------|-------|
| WT     | Br1       | 20088          | 19833.7 | 329.1 |
|        | Br2       | 19951          |         |       |
|        | Br3       | 19462          |         |       |
| GPAT6  | Br1       | 20178          | 20678.7 | 435.7 |
|        | Br2       | 20886          |         |       |
|        | Br3       | 20972          |         |       |

4

5 Genes detected after the differential analysis: 567

6 **Reads properly paired**

---

| condition | reads properly paired |
|-----------|-----------------------|
| GPAT6-BR1 | 16496720              |
| GPAT6-BR2 | 22418700              |
| GPAT6-BR3 | 20044472              |
| WT-BR1    | 14136212              |
| WT-BR2    | 18573428              |
| WT-BR3    | 11557950              |

---

7
