# Supplementary material
Source: PubMed Central journal article supplement (PMC4902622)

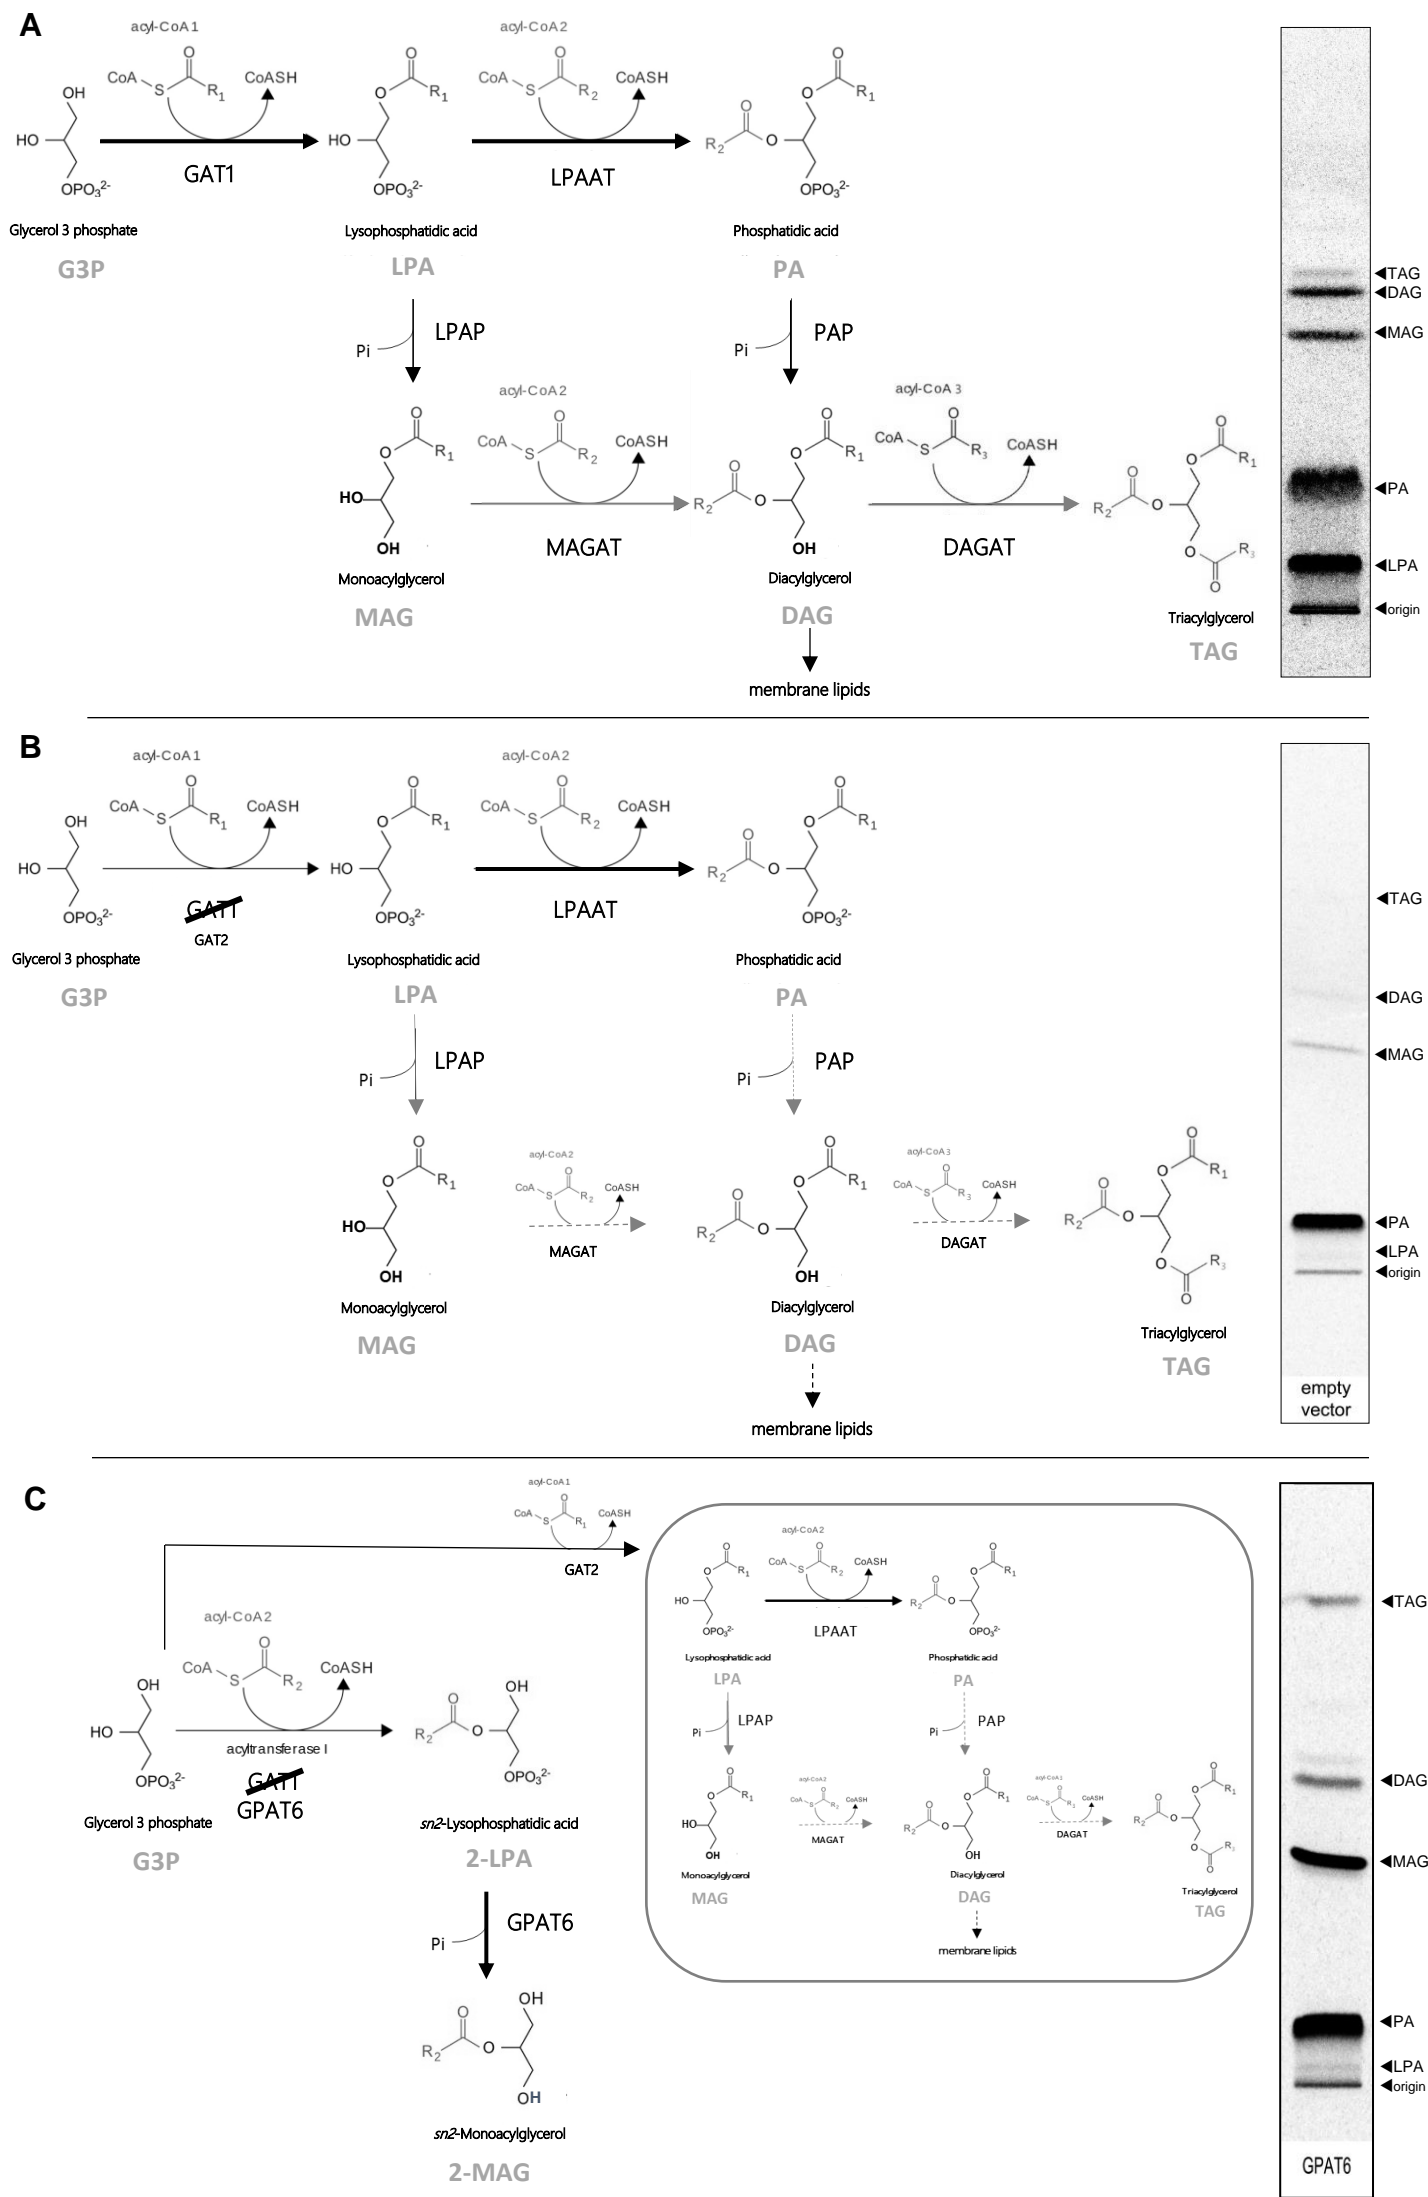

Supplement: supp_pp.16.00409_PP2016-00409R1_Sup_Fig_S2.pdf [file supp_pp.16.00409_PP2016-00409R1_Sup_Fig_S2.pdf]

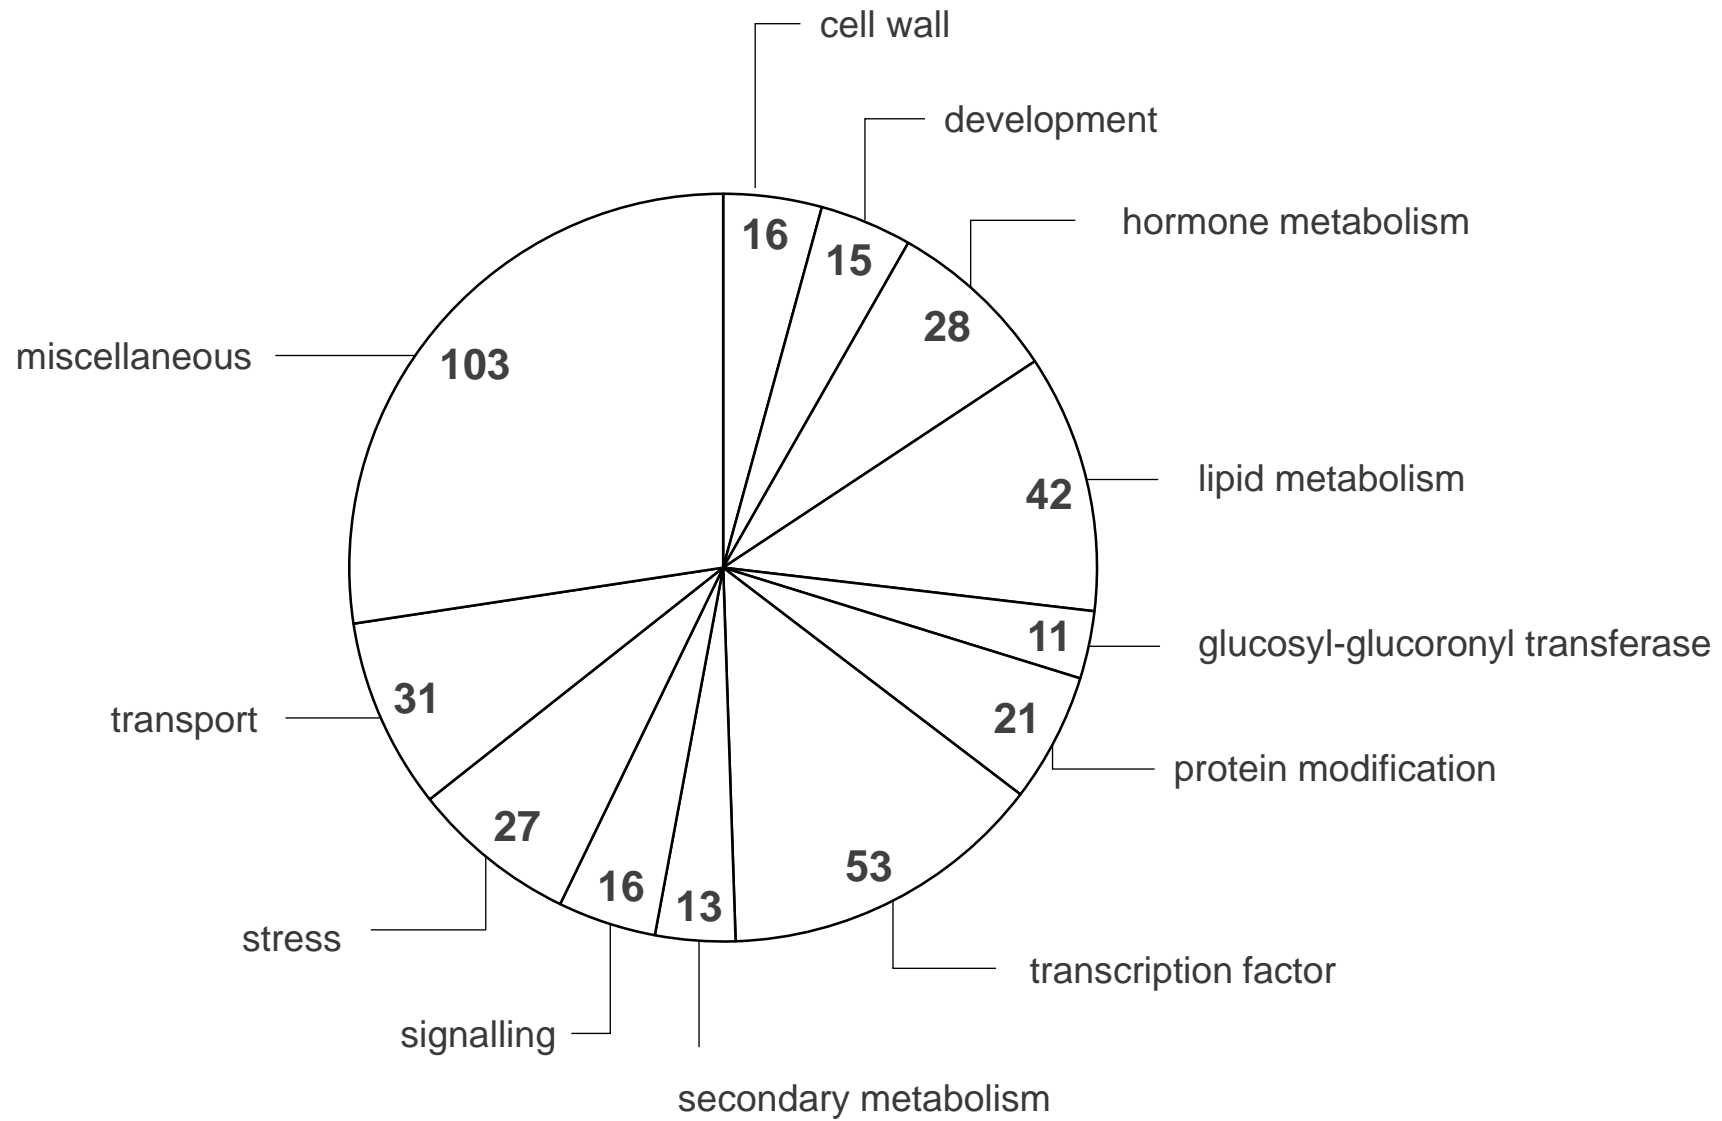

Supplement: supp_pp.16.00409_PP2016-00409R1_Sup_Fig_S5.pdf [file supp_pp.16.00409_PP2016-00409R1_Sup_Fig_S5.pdf]
